# Supplementary material for: Self-assembling, reactivity and molecular dynamics of fullerenol nanoparticles
Source: Royal Society of Chemistry journal article supplement (doi:10.1039/c6cp06847b), 2016-11-22
Supplement: c6cp06847b1.pdf [file c6cp06847b1.pdf]

## Electronic Supplementary Information

### Self-assembling, Reactivity and Molecular Dynamics of Fullerene Nanoparticles

Milan Vraneš\*, Ivana Borišev, Aleksandar Tot, Stevan Armaković, Sanja J. Armaković, Danica Jović, Slobodan Gadžurić, Aleksandar Djordjević\*

**Table 1.** Density ( $d$ ), apparent molar volume ( $V_\phi$ ), and partial molar volume ( $V_i$ ) at different temperatures and molality of fullerene ( $m$ ) compositions of the {fullerene (2) + H<sub>2</sub>O (1)} mixtures at  $p = 0.1$  MPa.

| $m$<br>[mol·kg <sup>-1</sup> ] | $d$<br>[g·cm <sup>-3</sup> ] | $V_1$<br>[cm <sup>3</sup> ·mol <sup>-1</sup> ] | $V_2$<br>[cm <sup>3</sup> ·mol <sup>-1</sup> ] | $V_\phi$<br>[cm <sup>3</sup> ·mol <sup>-1</sup> ] |
|--------------------------------|------------------------------|------------------------------------------------|------------------------------------------------|---------------------------------------------------|
| $T = 293.15$ K                 |                              |                                                |                                                |                                                   |
| 0.00000 <sup>a</sup>           | 0.99821                      |                                                |                                                |                                                   |
| 0.00088                        | 0.99868                      | 18.032                                         | 592.36                                         | 596.35                                            |
| 0.00283                        | 0.99974                      | 18.033                                         | 578.25                                         | 585.73                                            |
| 0.00363                        | 1.00018                      | 18.033                                         | 574.64                                         | 583.11                                            |
| 0.00447                        | 1.00065                      | 18.033                                         | 569.85                                         | 579.21                                            |
| 0.00692                        | 1.00201                      | 18.034                                         | 562.71                                         | 574.21                                            |
| 0.00897                        | 1.00317                      | 18.035                                         | 556.13                                         | 568.94                                            |
| 0.01065                        | 1.00411                      | 18.036                                         | 553.24                                         | 566.88                                            |
| 0.01311                        | 1.00552                      | 18.037                                         | 546.89                                         | 561.91                                            |
| $T = 295.15$ K                 |                              |                                                |                                                |                                                   |
| 0.00000 <sup>a</sup>           | 0.99777                      |                                                |                                                |                                                   |
| 0.00088                        | 0.99823                      | 18.040                                         | 597.38                                         | 601.83                                            |
| 0.00283                        | 0.99929                      | 18.041                                         | 580.60                                         | 589.08                                            |
| 0.00363                        | 0.99973                      | 18.041                                         | 576.05                                         | 585.65                                            |
| 0.00447                        | 1.00019                      | 18.041                                         | 572.82                                         | 583.49                                            |
| 0.00692                        | 1.00155                      | 18.042                                         | 563.72                                         | 576.89                                            |
| 0.00897                        | 1.00270                      | 18.043                                         | 557.32                                         | 572.09                                            |
| 0.01065                        | 1.00365                      | 18.044                                         | 552.76                                         | 568.66                                            |
| 0.01311                        | 1.00507                      | 18.046                                         | 545.03                                         | 562.45                                            |
| $T = 298.15$ K                 |                              |                                                |                                                |                                                   |
| 0.00000 <sup>a</sup>           | 0.99705                      |                                                |                                                |                                                   |
| 0.00088                        | 0.99751                      | 18.053                                         | 602.36                                         | 607.20                                            |
| 0.00283                        | 0.99856                      | 18.054                                         | 582.84                                         | 592.28                                            |
| 0.00363                        | 0.99899                      | 18.054                                         | 580.09                                         | 590.85                                            |
| 0.00447                        | 0.99946                      | 18.054                                         | 573.41                                         | 585.39                                            |
| 0.00692                        | 1.00082                      | 18.056                                         | 563.09                                         | 577.94                                            |
| 0.00897                        | 1.00196                      | 18.057                                         | 557.18                                         | 573.95                                            |
| 0.01065                        | 1.00291                      | 18.058                                         | 552.05                                         | 569.89                                            |
| 0.01311                        | 1.00433                      | 18.059                                         | 543.67                                         | 563.60                                            |
| $T = 303.15$ K                 |                              |                                                |                                                |                                                   |
| 0.00000 <sup>a</sup>           | 0.99565                      |                                                |                                                |                                                   |
| 0.00088                        | 0.99609                      | 18.079                                         | 622.38                                         | 629.45                                            |
| 0.00283                        | 0.99711                      | 18.080                                         | 595.55                                         | 609.50                                            |
| 0.00363                        | 0.99754                      | 18.080                                         | 588.19                                         | 604.11                                            |
| 0.00447                        | 0.99799                      | 18.080                                         | 582.76                                         | 600.56                                            |
| 0.00692                        | 0.99933                      | 18.082                                         | 568.16                                         | 590.39                                            |
| 0.00897                        | 1.00048                      | 18.084                                         | 557.00                                         | 582.26                                            |

|                        |         |        |        |        |
|------------------------|---------|--------|--------|--------|
| 0.01065                | 1.00143 | 18.085 | 549.61 | 577.02 |
| 0.01311                | 1.00285 | 18.087 | 538.69 | 569.00 |
| $T = 309.15 \text{ K}$ |         |        |        |        |
| 0.00000 <sup>a</sup>   | 0.99369 |        |        |        |
| 0.00088                | 0.99409 | 18.115 | 661.17 | 674.91 |
| 0.00283                | 0.99504 | 18.116 | 622.13 | 648.24 |
| 0.00363                | 0.99545 | 18.117 | 609.94 | 639.73 |
| 0.00447                | 0.99590 | 18.117 | 596.08 | 629.30 |
| 0.00692                | 0.99723 | 18.120 | 568.51 | 610.05 |
| 0.00897                | 0.99838 | 18.123 | 549.84 | 597.17 |
| 0.01065                | 0.99933 | 18.125 | 537.85 | 589.36 |
| 0.01311                | 1.00080 | 18.130 | 517.79 | 574.86 |
| $T = 310.15 \text{ K}$ |         |        |        |        |
| 0.00000 <sup>a</sup>   | 0.99333 |        |        |        |
| 0.00088                | 0.99372 | 18.121 | 670.79 | 686.16 |
| 0.00283                | 0.99464 | 18.123 | 633.09 | 662.55 |
| 0.00363                | 0.99504 | 18.123 | 620.08 | 653.68 |
| 0.00447                | 0.99550 | 18.124 | 600.90 | 638.31 |
| 0.00692                | 0.99682 | 18.127 | 570.52 | 617.27 |
| 0.00897                | 0.99795 | 18.130 | 551.68 | 604.99 |
| 0.01065                | 0.99892 | 18.133 | 535.99 | 593.98 |
| 0.01311                | 1.00041 | 18.138 | 512.74 | 577.01 |
| $T = 313.15 \text{ K}$ |         |        |        |        |
| 0.00000 <sup>a</sup>   | 0.99222 |        |        |        |
| 0.00088                | 0.99254 | 18.142 | 739.42 | 766.94 |
| 0.00283                | 0.99338 | 18.144 | 665.69 | 716.55 |
| 0.00363                | 0.99378 | 18.145 | 637.95 | 695.70 |
| 0.00447                | 0.99419 | 18.147 | 619.57 | 683.83 |
| 0.00692                | 0.99548 | 18.152 | 570.89 | 650.72 |
| 0.00897                | 0.99665 | 18.157 | 535.12 | 626.23 |
| 0.01065                | 0.99765 | 18.162 | 509.70 | 608.85 |
| 0.01311                | 0.99918 | 18.169 | 475.89 | 585.80 |

<sup>a</sup>reference<sup>[32]</sup>)

**Table 2.** Viscosity ( $\eta$ ) of {fullerenol+ H<sub>2</sub>O} binary mixture as a function of fullerenol molality ( $m$ ) in the temperature range from (293.15 to 313.15) K at  $p = 0.1 \text{ MPa}$ .

| $m$<br>[mol·kg <sup>-1</sup> ] | $T$ [K]        |        |        |        |        |        |
|--------------------------------|----------------|--------|--------|--------|--------|--------|
|                                | 293.15         | 298.15 | 303.15 | 309.15 | 310.15 | 313.15 |
|                                | $\eta$ [mPa·s] |        |        |        |        |        |
| 0.00000 <sup>a</sup>           | 1.003          | 0.890  | 0.797  | 0.719  | 0.691  | 0.653  |
| 0.00450                        | 1.236          | 1.112  | 1.057  | 0.974  | 0.970  | 0.960  |
| 0.00523                        | 1.248          | 1.124  | 1.071  | 0.989  | 0.986  | 0.972  |
| 0.00680                        | 1.269          | 1.144  | 1.090  | 1.010  | 1.006  | 0.990  |
| 0.01150                        | 1.315          | 1.192  | 1.137  | 1.050  | 1.043  | 1.020  |
| 0.01450                        | 1.332          | 1.205  | 1.165  | 1.073  | 1.066  | 1.033  |
| 0.01724                        | 1.347          | 1.222  | 1.180  | 1.091  | 1.081  | 1.044  |
| 0.02500                        | 1.373          | 1.256  | 1.214  | 1.130  | 1.113  | 1.056  |
| 0.03724                        | 1.404          | 1.301  | 1.269  | 1.159  | 1.140  | 1.074  |

<sup>a</sup>reference<sup>[32]</sup>)

**Table 3.** Masson's equation fitting parameters for the {fullerenol + H<sub>2</sub>O} solutions in the temperature range from (293.15 to 313.15) K with the deviations of their fit ( $\sigma$ ) and regression coefficient ( $R^2$ ).

| $T$ [K] | $V_{\phi}^o$ [cm <sup>3</sup> ·mol <sup>-1</sup> ] | $S_v$ [cm <sup>9/2</sup> ·mol <sup>-3/2</sup> ] | $R^2$  |
|---------|----------------------------------------------------|-------------------------------------------------|--------|
| 293.15  | 607.31                                             | -401.07                                         | 0.9993 |
| 295.15  | 613.73                                             | -446.79                                         | 0.9991 |
| 298.15  | 620.33                                             | -499.82                                         | 0.9992 |
| 303.15  | 647.76                                             | -696.28                                         | 0.9994 |
| 309.15  | 710.38                                             | -1104.42                                        | 0.9991 |
| 310.15  | 728.92                                             | -1324.20                                        | 0.9992 |
| 313.15  | 828.41                                             | -2148.10                                        | 0.9989 |

**Table 4.** Electrical conductivity of {fullerenol + H<sub>2</sub>O} binary mixtures as a function of fullerenol molality in the temperature range from (293.15 to 313.15) K and at  $p = 0.1$  MPa.

| $m$<br>[mol·kg <sup>-1</sup> ] | $T$ [K]                         |        |        |        |        |        |
|--------------------------------|---------------------------------|--------|--------|--------|--------|--------|
|                                | 293.15                          | 298.15 | 303.15 | 309.15 | 310.15 | 313.15 |
|                                | $\kappa$ [mS·cm <sup>-1</sup> ] |        |        |        |        |        |
| 0.00098                        | 0.046                           | 0.054  | 0.060  | 0.070  | 0.077  | 0.082  |
| 0.00150                        | 0.068                           | 0.079  | 0.089  | 0.104  | 0.113  | 0.121  |
| 0.00295                        | 0.127                           | 0.148  | 0.167  | 0.193  | 0.206  | 0.218  |
| 0.00537                        | 0.215                           | 0.252  | 0.284  | 0.328  | 0.345  | 0.357  |
| 0.01046                        | 0.391                           | 0.457  | 0.521  | 0.595  | 0.623  | 0.649  |
| 0.01927                        | 0.682                           | 0.784  | 0.890  | 1.021  | 1.060  | 1.117  |
| 0.02645                        | 0.896                           | 1.030  | 1.162  | 1.326  | 1.382  | 1.453  |
| 0.03431                        | 1.107                           | 1.268  | 1.434  | 1.609  | 1.684  | 1.805  |
| 0.04122                        | 1.291                           | 1.469  | 1.660  | 1.855  | 1.950  | 2.103  |
| 0.04894                        | 1.507                           | 1.698  | 1.918  | 2.131  | 2.223  | 2.423  |

**Table 5.** Jones–Dole's equation fitting parameters for the viscosity of {fullerenol+ H<sub>2</sub>O} solutions in the temperature range from (293.15 to 313.15) K with the deviations of their fit ( $\sigma$ ) and regression coefficient ( $R^2$ ).

| $T$ [K] | $A$ [dm <sup>3/2</sup> ·mol <sup>-1/2</sup> ] | $B$ [dm <sup>3</sup> ·mol <sup>-1</sup> ] | $R^2$  |
|---------|-----------------------------------------------|-------------------------------------------|--------|
| 293.15  | 4.166                                         | -11.36                                    | 0.9991 |
| 298.15  | 4.414                                         | -11.60                                    | 0.9993 |
| 303.15  | 6.085                                         | -19.05                                    | 0.9989 |
| 309.15  | 7.240                                         | -23.51                                    | 0.9986 |
| 310.15  | 7.655                                         | -24.90                                    | 0.9984 |
| 313.15  | 8.797                                         | -29.80                                    | 0.9977 |

**Table 6.** Molar conductivity of {fullerenol + H<sub>2</sub>O} binary mixtures as a function of fullerenol molality in the temperature range from (293.15 to 313.15) K and at  $p = 0.1$  MPa.

| $m$<br>[mol·kg <sup>-1</sup> ] | $T$ [K]                                           |        |        |        |        |        |
|--------------------------------|---------------------------------------------------|--------|--------|--------|--------|--------|
|                                | 293.15                                            | 298.15 | 303.15 | 309.15 | 310.15 | 313.15 |
|                                | $\Lambda$ [S·cm <sup>2</sup> ·mol <sup>-1</sup> ] |        |        |        |        |        |
| 0.00000                        | 54.08                                             | 62.82  | 70.62  | 82.27  | 92.36  | 101.41 |
| 0.00098                        | 48.87                                             | 57.19  | 64.34  | 74.70  | 81.88  | 88.10  |
| 0.00150                        | 47.30                                             | 54.98  | 62.02  | 72.06  | 78.62  | 84.09  |
| 0.00295                        | 44.83                                             | 52.12  | 58.96  | 68.14  | 72.80  | 77.15  |
| 0.00537                        | 41.60                                             | 48.89  | 55.21  | 63.83  | 67.15  | 69.51  |
| 0.01046                        | 38.95                                             | 45.62  | 52.12  | 59.61  | 62.43  | 65.10  |
| 0.01927                        | 37.12                                             | 42.71  | 48.57  | 55.83  | 57.95  | 61.20  |
| 0.02645                        | 35.64                                             | 41.02  | 46.37  | 53.02  | 55.27  | 58.21  |
| 0.03431                        | 34.10                                             | 39.12  | 44.29  | 49.80  | 52.15  | 55.98  |
| 0.04122                        | 33.24                                             | 37.86  | 42.84  | 47.97  | 50.45  | 54.48  |
| 0.04894                        | 32.80                                             | 37.00  | 41.88  | 46.62  | 48.64  | 53.09  |

<sup>a</sup> values obtained using equation  $\Lambda = \kappa/c$ )

**Table 7.** Values of the limiting apparent molar expansibilities at different temperatures

| $T$ [K]                                                                   | 293.15 | 295.15 | 298.15 | 303.15 | 309.15 | 310.15 | 313.15 |
|---------------------------------------------------------------------------|--------|--------|--------|--------|--------|--------|--------|
| $E_{\phi}^{\circ}$ [cm <sup>3</sup> ·mol <sup>-1</sup> ·K <sup>-1</sup> ] | -5.15  | -2.18  | 2.27   | 9.68   | 18.58  | 20.06  | 24.51  |

**Table 8.** Bond lengths [Å] comparison for C<sub>60</sub> as obtained by DFT and OPLS\_2005

|     |     | DFT    | OPLS_2005 |     |     | DFT    | OPLS_2005 |
|-----|-----|--------|-----------|-----|-----|--------|-----------|
| C1  | C2  | 1.4531 | 1.4106    | C1  | C6  | 1.3924 | 1.4186    |
| C1  | C7  | 1.4508 | 1.4102    | C2  | C3  | 1.3928 | 1.4177    |
| C2  | C9  | 1.4500 | 1.4099    | C3  | C4  | 1.4513 | 1.4103    |
| C3  | C11 | 1.4532 | 1.4082    | C4  | C5  | 1.3941 | 1.4190    |
| C4  | C12 | 1.4513 | 1.4110    | C5  | C6  | 1.4528 | 1.4103    |
| C5  | C15 | 1.4509 | 1.4113    | C6  | C17 | 1.4524 | 1.4087    |
| C7  | C8  | 1.4525 | 1.4080    | C7  | C19 | 1.3959 | 1.4179    |
| C8  | C9  | 1.4525 | 1.4069    | C8  | C20 | 1.3915 | 1.4174    |
| C9  | C10 | 1.3949 | 1.4166    | C10 | C57 | 1.4515 | 1.4072    |
| C10 | C59 | 1.4535 | 1.4087    | C11 | C29 | 1.4512 | 1.4060    |
| C11 | C59 | 1.3946 | 1.4164    | C12 | C13 | 1.3926 | 1.4169    |
| C12 | C29 | 1.4531 | 1.4081    | C13 | C14 | 1.4514 | 1.4075    |
| C13 | C39 | 1.4506 | 1.4085    | C14 | C15 | 1.3935 | 1.4174    |
| C14 | C28 | 1.4511 | 1.4095    | C15 | C16 | 1.4525 | 1.4093    |
| C16 | C17 | 1.4511 | 1.4075    | C16 | C26 | 1.3923 | 1.4172    |
| C17 | C18 | 1.3955 | 1.4177    | C18 | C19 | 1.4542 | 1.4089    |
| C18 | C24 | 1.4545 | 1.4087    | C19 | C22 | 1.4543 | 1.4109    |
| C20 | C21 | 1.4508 | 1.4077    | C20 | C56 | 1.4518 | 1.4087    |
| C21 | C22 | 1.3953 | 1.4167    | C21 | C54 | 1.4512 | 1.4095    |
| C22 | C23 | 1.4543 | 1.4087    | C23 | C24 | 1.4541 | 1.4064    |
| C23 | C52 | 1.3959 | 1.4168    | C24 | C25 | 1.3954 | 1.4170    |

|                        |     |        |        |     |     |        |        |
|------------------------|-----|--------|--------|-----|-----|--------|--------|
| C25                    | C26 | 1.4510 | 1.4077 | C25 | C50 | 1.4521 | 1.4085 |
| C26                    | C27 | 1.4529 | 1.4093 | C27 | C28 | 1.3939 | 1.4169 |
| C27                    | C49 | 1.4511 | 1.4096 | C28 | C38 | 1.4534 | 1.4096 |
| C29                    | C58 | 1.3945 | 1.4162 | C30 | C31 | 1.3953 | 1.4170 |
| C30                    | C37 | 1.4537 | 1.4077 | C30 | C60 | 1.4525 | 1.4115 |
| C31                    | C32 | 1.4549 | 1.4079 | C31 | C40 | 1.4519 | 1.4083 |
| C32                    | C33 | 1.3953 | 1.4179 | C32 | C41 | 1.4553 | 1.4097 |
| C33                    | C34 | 1.4539 | 1.4091 | C33 | C44 | 1.4535 | 1.4113 |
| C34                    | C46 | 1.4523 | 1.4072 | C34 | C60 | 1.3946 | 1.4192 |
| C35                    | C36 | 1.4506 | 1.4078 | C35 | C48 | 1.3934 | 1.4167 |
| C35                    | C60 | 1.4530 | 1.4120 | C36 | C37 | 1.4524 | 1.4060 |
| C36                    | C49 | 1.3936 | 1.4173 | C37 | C38 | 1.3938 | 1.4175 |
| C38                    | C39 | 1.4520 | 1.4087 | C39 | C40 | 1.3939 | 1.4177 |
| C40                    | C58 | 1.4529 | 1.4083 | C41 | C42 | 1.3970 | 1.4174 |
| C41                    | C58 | 1.4546 | 1.4094 | C42 | C43 | 1.4551 | 1.4077 |
| C42                    | C59 | 1.4555 | 1.4105 | C43 | C44 | 1.3960 | 1.4164 |
| C43                    | C57 | 1.4532 | 1.4077 | C44 | C45 | 1.4551 | 1.4095 |
| C45                    | C46 | 1.4522 | 1.4067 | C45 | C55 | 1.3946 | 1.4165 |
| C46                    | C47 | 1.3943 | 1.4164 | C47 | C48 | 1.4507 | 1.4076 |
| C47                    | C53 | 1.4525 | 1.4087 | C48 | C51 | 1.4534 | 1.4095 |
| C49                    | C50 | 1.4529 | 1.4086 | C50 | C51 | 1.3930 | 1.4179 |
| C51                    | C52 | 1.4514 | 1.4088 | C52 | C53 | 1.4531 | 1.4079 |
| C53                    | C54 | 1.3920 | 1.4174 | C54 | C55 | 1.4536 | 1.4090 |
| C55                    | C56 | 1.4507 | 1.4080 | C56 | C57 | 1.3933 | 1.4176 |
| <b>RMSE = 0.0382 Å</b> |     |        |        |     |     |        |        |

**Table 9.** Bond lengths [Å] comparison for C<sub>60</sub>(OH)<sub>24</sub> as obtained by DFT and OPLS\_2005

|     |     | DFT    | OPLS_2005 |     |     | DFT    | OPLS_2005 |
|-----|-----|--------|-----------|-----|-----|--------|-----------|
| C1  | C2  | 1.5348 | 1.5287    | C1  | C5  | 1.5202 | 1.5148    |
| C1  | C9  | 1.5060 | 1.5209    | C1  | O61 | 1.4385 | 1.4109    |
| C2  | C3  | 1.5375 | 1.5298    | C2  | C12 | 1.3374 | 1.3537    |
| C3  | C4  | 1.5266 | 1.5130    | C3  | C15 | 1.5032 | 1.5225    |
| C3  | O62 | 1.4313 | 1.4110    | C4  | C5  | 1.3365 | 1.3371    |
| C4  | C18 | 1.5072 | 1.5221    | C5  | C6  | 1.5103 | 1.5239    |
| C6  | C7  | 1.5267 | 1.5129    | C6  | C20 | 1.5316 | 1.5283    |
| C6  | O63 | 1.4320 | 1.4106    | C7  | C8  | 1.5058 | 1.5224    |
| C7  | C22 | 1.3357 | 1.3373    | C8  | C9  | 1.5278 | 1.5121    |
| C8  | C25 | 1.5374 | 1.5289    | C8  | O64 | 1.4308 | 1.4110    |
| C9  | C10 | 1.3352 | 1.3359    | C10 | C11 | 1.5049 | 1.5206    |
| C10 | C26 | 1.5254 | 1.5137    | C11 | C12 | 1.5389 | 1.5288    |
| C11 | C29 | 1.5234 | 1.5147    | C11 | O65 | 1.4321 | 1.4101    |
| C12 | C13 | 1.5322 | 1.5289    | C13 | C14 | 1.5094 | 1.5230    |
| C13 | C30 | 1.5249 | 1.5139    | C13 | O66 | 1.4299 | 1.4097    |
| C14 | C15 | 1.3349 | 1.3372    | C14 | C33 | 1.5253 | 1.5138    |
| C15 | C16 | 1.5261 | 1.5139    | C16 | C17 | 1.5110 | 1.5241    |
| C16 | C34 | 1.5321 | 1.5279    | C16 | O67 | 1.4308 | 1.4107    |
| C17 | C18 | 1.5219 | 1.5161    | C17 | C37 | 1.3368 | 1.3381    |
| C18 | C19 | 1.5337 | 1.5278    | C18 | O68 | 1.4373 | 1.4113    |
| C19 | C20 | 1.3368 | 1.3530    | C19 | C38 | 1.5373 | 1.5282    |

|                        |     |        |        |     |      |        |        |
|------------------------|-----|--------|--------|-----|------|--------|--------|
| C20                    | C21 | 1.5376 | 1.5279 | C21 | C22  | 1.5258 | 1.5161 |
| C21                    | C40 | 1.5051 | 1.5214 | C21 | O69  | 1.4296 | 1.4104 |
| C22                    | C23 | 1.5068 | 1.5241 | C23 | C24  | 1.5362 | 1.5269 |
| C23                    | C42 | 1.5250 | 1.5133 | C23 | O70  | 1.4303 | 1.4101 |
| C24                    | C25 | 1.3353 | 1.3527 | C24 | C44  | 1.5320 | 1.5282 |
| C25                    | C26 | 1.5312 | 1.5286 | C26 | C27  | 1.5097 | 1.5236 |
| C26                    | O71 | 1.4321 | 1.4098 | C27 | C28  | 1.5253 | 1.5143 |
| C27                    | C45 | 1.3368 | 1.3380 | C28 | C29  | 1.5052 | 1.5254 |
| C28                    | C47 | 1.5372 | 1.5280 | C28 | O72  | 1.4314 | 1.4103 |
| C29                    | C30 | 1.3350 | 1.3372 | C30 | C31  | 1.5055 | 1.5213 |
| C31                    | C32 | 1.5259 | 1.5159 | C31 | C48  | 1.5375 | 1.5277 |
| C31                    | O73 | 1.4293 | 1.4104 | C32 | C33  | 1.5063 | 1.5240 |
| C32                    | C50 | 1.3357 | 1.3371 | C33 | C34  | 1.5361 | 1.5271 |
| C33                    | O74 | 1.4303 | 1.4101 | C34 | C35  | 1.3359 | 1.3528 |
| C35                    | C36 | 1.5312 | 1.5286 | C35 | C51  | 1.5373 | 1.5292 |
| C36                    | C37 | 1.5100 | 1.5235 | C36 | C53  | 1.5254 | 1.5132 |
| C36                    | O75 | 1.4321 | 1.4098 | C37 | C38  | 1.5251 | 1.5145 |
| C38                    | C39 | 1.5047 | 1.5255 | C38 | O76  | 1.4315 | 1.4103 |
| C39                    | C40 | 1.3348 | 1.3373 | C39 | C54  | 1.5238 | 1.5151 |
| C40                    | C41 | 1.5251 | 1.5141 | C41 | C42  | 1.5093 | 1.5229 |
| C41                    | C55 | 1.5319 | 1.5284 | C41 | O77  | 1.4299 | 1.4097 |
| C42                    | C43 | 1.3350 | 1.3372 | C43 | C44  | 1.5252 | 1.5139 |
| C43                    | C60 | 1.5034 | 1.5225 | C44 | C45  | 1.5115 | 1.5238 |
| C44                    | O78 | 1.4307 | 1.4107 | C45 | C46  | 1.5223 | 1.5163 |
| C46                    | C47 | 1.5334 | 1.5280 | C46 | C59  | 1.5072 | 1.5220 |
| C46                    | O79 | 1.4374 | 1.4113 | C47 | C48  | 1.3366 | 1.3530 |
| C48                    | C49 | 1.5315 | 1.5285 | C49 | C50  | 1.5268 | 1.5131 |
| C49                    | C58 | 1.5111 | 1.5239 | C49 | O80  | 1.4325 | 1.4106 |
| C50                    | C51 | 1.5061 | 1.5221 | C51 | C52  | 1.5270 | 1.5118 |
| C51                    | O81 | 1.4307 | 1.4110 | C52 | C53  | 1.3352 | 1.3357 |
| C52                    | C57 | 1.5063 | 1.5207 | C53 | C54  | 1.5044 | 1.5204 |
| C54                    | C55 | 1.5387 | 1.5288 | C54 | O82  | 1.4322 | 1.4101 |
| C55                    | C56 | 1.3374 | 1.3537 | C56 | C57  | 1.5350 | 1.5284 |
| C56                    | C60 | 1.5377 | 1.5296 | C57 | C58  | 1.5208 | 1.5150 |
| C57                    | O83 | 1.4377 | 1.4109 | C58 | C59  | 1.3368 | 1.3371 |
| C59                    | C60 | 1.5270 | 1.5132 | C60 | O84  | 1.4313 | 1.4110 |
| O61                    | H85 | 0.9688 | 0.9503 | O62 | H86  | 0.9690 | 0.9510 |
| O63                    | H87 | 0.9706 | 0.9511 | O64 | H88  | 0.9694 | 0.9519 |
| O65                    | H89 | 0.9695 | 0.9506 | O66 | H90  | 0.9708 | 0.9526 |
| O67                    | H91 | 0.9702 | 0.9505 | O68 | H92  | 0.9691 | 0.9504 |
| O69                    | H93 | 0.9693 | 0.9500 | O70 | H94  | 0.9698 | 0.9507 |
| O71                    | H95 | 0.9707 | 0.9522 | O72 | H96  | 0.9694 | 0.9505 |
| O73                    | H97 | 0.9693 | 0.9500 | O74 | H98  | 0.9698 | 0.9507 |
| O75                    | H99 | 0.9707 | 0.9522 | O76 | H100 | 0.9695 | 0.9505 |
| O77                    | H10 | 0.9708 | 0.9526 | O78 | H102 | 0.9702 | 0.9505 |
| O79                    | H10 | 0.9691 | 0.9504 | O80 | H104 | 0.9706 | 0.9511 |
| O81                    | H10 | 0.9694 | 0.9519 | O82 | H106 | 0.9695 | 0.9506 |
| O83                    | H10 | 0.9689 | 0.9503 | O84 | H108 | 0.9690 | 0.9510 |
| <b>RMSE = 0.0152 Å</b> |     |        |        |     |      |        |        |

**Table 10.** Bond angles [°] comparison for C<sub>60</sub> as obtained by DFT and OPLS\_2005

|     |     |     | DFT    | OPLS_2005 |     |     |     | DFT    | OPLS_2005 |
|-----|-----|-----|--------|-----------|-----|-----|-----|--------|-----------|
| C6  | C1  | C2  | 120.17 | 119.98    | C7  | C1  | C2  | 108.17 | 107.83    |
| C7  | C1  | C6  | 120.04 | 120.00    | C3  | C2  | C1  | 120.23 | 119.95    |
| C9  | C2  | C1  | 108.03 | 107.83    | C9  | C2  | C3  | 119.87 | 119.94    |
| C4  | C3  | C2  | 119.63 | 120.11    | C11 | C3  | C2  | 119.93 | 119.86    |
| C11 | C3  | C4  | 108.07 | 107.69    | C5  | C4  | C3  | 120.17 | 119.96    |
| C12 | C4  | C3  | 107.93 | 108.26    | C12 | C4  | C5  | 120.21 | 119.71    |
| C6  | C5  | C4  | 120.19 | 119.94    | C15 | C5  | C4  | 120.10 | 119.78    |
| C15 | C5  | C6  | 107.99 | 108.29    | C5  | C6  | C1  | 119.61 | 120.07    |
| C17 | C6  | C1  | 119.70 | 120.02    | C17 | C6  | C5  | 108.12 | 107.71    |
| C8  | C7  | C1  | 107.71 | 108.26    | C19 | C7  | C1  | 120.33 | 119.96    |
| C19 | C7  | C8  | 120.47 | 120.23    | C9  | C8  | C7  | 108.26 | 107.78    |
| C20 | C8  | C7  | 119.65 | 119.93    | C20 | C8  | C9  | 119.62 | 120.27    |
| C8  | C9  | C2  | 107.83 | 108.31    | C10 | C9  | C2  | 120.21 | 120.29    |
| C10 | C9  | C8  | 120.45 | 119.65    | C57 | C10 | C9  | 119.68 | 120.43    |
| C59 | C10 | C9  | 120.09 | 119.56    | C59 | C10 | C57 | 107.84 | 107.59    |
| C29 | C11 | C3  | 107.96 | 108.17    | C59 | C11 | C3  | 120.38 | 120.02    |
| C59 | C11 | C29 | 120.07 | 120.11    | C13 | C12 | C4  | 119.63 | 120.38    |
| C29 | C12 | C4  | 108.08 | 107.62    | C29 | C12 | C13 | 119.80 | 119.84    |
| C14 | C13 | C12 | 120.21 | 119.94    | C39 | C13 | C12 | 120.07 | 120.02    |
| C39 | C13 | C14 | 108.09 | 107.62    | C15 | C14 | C13 | 120.15 | 119.81    |
| C28 | C14 | C13 | 107.97 | 108.17    | C28 | C14 | C15 | 120.22 | 119.71    |
| C14 | C15 | C5  | 119.70 | 120.38    | C16 | C15 | C5  | 107.88 | 107.64    |
| C16 | C15 | C14 | 119.78 | 119.95    | C17 | C16 | C15 | 108.23 | 108.19    |
| C26 | C16 | C15 | 120.05 | 120.44    | C26 | C16 | C17 | 119.97 | 119.81    |
| C16 | C17 | C6  | 107.78 | 108.18    | C18 | C17 | C6  | 120.46 | 119.94    |
| C18 | C17 | C16 | 120.26 | 120.28    | C19 | C18 | C17 | 119.72 | 120.10    |
| C24 | C18 | C17 | 119.78 | 119.82    | C24 | C18 | C19 | 108.01 | 107.72    |
| C18 | C19 | C7  | 119.74 | 119.97    | C22 | C19 | C7  | 119.75 | 119.58    |
| C22 | C19 | C18 | 107.96 | 108.29    | C21 | C20 | C8  | 120.09 | 120.12    |
| C56 | C20 | C8  | 120.12 | 119.80    | C56 | C20 | C21 | 108.23 | 107.60    |
| C22 | C21 | C20 | 120.38 | 119.81    | C54 | C21 | C20 | 107.69 | 108.15    |
| C54 | C21 | C22 | 120.48 | 119.66    | C21 | C22 | C19 | 119.66 | 120.33    |
| C23 | C22 | C19 | 108.06 | 107.63    | C23 | C22 | C21 | 119.65 | 119.88    |
| C24 | C23 | C22 | 107.95 | 108.21    | C52 | C23 | C22 | 119.72 | 120.40    |
| C52 | C23 | C24 | 119.77 | 119.71    | C23 | C24 | C18 | 108.02 | 108.15    |
| C25 | C24 | C18 | 119.76 | 119.94    | C25 | C24 | C23 | 119.68 | 120.17    |
| C26 | C25 | C24 | 120.32 | 120.14    | C50 | C25 | C24 | 120.52 | 119.86    |
| C50 | C25 | C26 | 107.84 | 107.61    | C25 | C26 | C16 | 119.90 | 120.00    |
| C27 | C26 | C16 | 120.12 | 119.50    | C27 | C26 | C25 | 108.24 | 108.19    |
| C28 | C27 | C26 | 119.85 | 120.19    | C49 | C27 | C26 | 107.81 | 108.10    |
| C49 | C27 | C28 | 119.67 | 119.67    | C27 | C28 | C14 | 119.97 | 120.21    |
| C38 | C28 | C14 | 108.01 | 108.13    | C38 | C28 | C27 | 120.35 | 119.63    |
| C12 | C29 | C11 | 107.96 | 108.25    | C58 | C29 | C11 | 120.11 | 120.16    |
| C58 | C29 | C12 | 120.34 | 119.98    | C37 | C30 | C31 | 120.34 | 120.53    |
| C60 | C30 | C31 | 120.14 | 119.45    | C60 | C30 | C37 | 108.00 | 107.70    |
| C32 | C31 | C30 | 120.11 | 120.36    | C40 | C31 | C30 | 119.59 | 119.20    |
| C40 | C31 | C32 | 107.89 | 108.03    | C33 | C32 | C31 | 119.65 | 119.96    |
| C41 | C32 | C31 | 108.09 | 108.01    | C41 | C32 | C33 | 119.86 | 119.75    |





**Table 11.** Bond angles [°] comparison for C<sub>60</sub>(OH)<sub>24</sub> as obtained by DFT and OPLS\_2005

|     |     |     | DFT    | OPLS_2005 |     |     |     | DFT    | OPLS_2005 |
|-----|-----|-----|--------|-----------|-----|-----|-----|--------|-----------|
| C5  | C1  | C2  | 100.69 | 100.77    | C9  | C1  | C2  | 110.28 | 112.03    |
| C9  | C1  | C5  | 108.64 | 112.01    | O61 | C1  | C2  | 115.21 | 110.70    |
| O61 | C1  | C5  | 107.72 | 110.13    | O61 | C1  | C9  | 113.33 | 110.82    |
| C3  | C2  | C1  | 108.83 | 109.63    | C12 | C2  | C1  | 123.19 | 122.43    |
| C12 | C2  | C3  | 123.26 | 122.62    | C4  | C3  | C2  | 100.21 | 100.65    |
| C15 | C3  | C2  | 109.85 | 111.95    | C15 | C3  | C4  | 108.55 | 112.40    |
| O62 | C3  | C2  | 116.70 | 112.13    | O62 | C3  | C4  | 113.16 | 109.12    |
| O62 | C3  | C15 | 108.01 | 110.25    | C5  | C4  | C3  | 112.57 | 112.70    |
| C18 | C4  | C3  | 123.05 | 122.03    | C18 | C4  | C5  | 123.42 | 123.24    |
| C4  | C5  | C1  | 112.27 | 112.45    | C6  | C5  | C1  | 122.76 | 122.28    |
| C6  | C5  | C4  | 124.10 | 122.98    | C7  | C6  | C5  | 108.96 | 112.30    |
| C20 | C6  | C5  | 109.96 | 111.98    | C20 | C6  | C7  | 100.20 | 100.63    |
| O63 | C6  | C5  | 112.55 | 111.00    | O63 | C6  | C7  | 113.21 | 110.04    |
| O63 | C6  | C20 | 111.27 | 110.47    | C8  | C7  | C6  | 122.74 | 121.91    |
| C22 | C7  | C6  | 112.63 | 112.68    | C22 | C7  | C8  | 123.58 | 123.26    |
| C9  | C8  | C7  | 108.61 | 112.40    | C25 | C8  | C7  | 110.26 | 111.97    |
| C25 | C8  | C9  | 100.13 | 100.58    | O64 | C8  | C7  | 108.32 | 110.19    |
| O64 | C8  | C9  | 112.97 | 109.25    | O64 | C8  | C25 | 116.20 | 112.13    |
| C8  | C9  | C1  | 123.22 | 122.18    | C10 | C9  | C1  | 123.58 | 123.18    |
| C10 | C9  | C8  | 112.27 | 112.60    | C11 | C10 | C9  | 123.97 | 123.05    |
| C26 | C10 | C9  | 112.58 | 112.70    | C26 | C10 | C11 | 122.70 | 122.25    |
| C12 | C11 | C10 | 110.17 | 111.97    | C29 | C11 | C10 | 108.68 | 112.04    |
| C29 | C11 | C12 | 100.31 | 100.87    | O65 | C11 | C10 | 107.32 | 109.78    |
| O65 | C11 | C12 | 116.54 | 111.15    | O65 | C11 | C29 | 113.56 | 110.79    |
| C11 | C12 | C2  | 122.71 | 122.62    | C13 | C12 | C2  | 123.04 | 122.69    |
| C13 | C12 | C11 | 109.22 | 109.60    | C14 | C13 | C12 | 109.75 | 111.97    |
| C30 | C13 | C12 | 100.09 | 100.60    | C30 | C13 | C14 | 108.55 | 112.50    |
| O66 | C13 | C12 | 111.86 | 110.63    | O66 | C13 | C14 | 113.42 | 110.82    |
| O66 | C13 | C30 | 112.35 | 109.92    | C15 | C14 | C13 | 124.16 | 123.13    |
| C33 | C14 | C13 | 122.85 | 122.16    | C33 | C14 | C15 | 112.18 | 112.43    |
| C14 | C15 | C3  | 123.68 | 123.23    | C16 | C15 | C3  | 122.83 | 122.04    |
| C16 | C15 | C14 | 112.62 | 112.58    | C17 | C16 | C15 | 108.80 | 112.41    |
| C34 | C16 | C15 | 100.11 | 100.62    | C34 | C16 | C17 | 109.76 | 111.99    |
| O67 | C16 | C15 | 112.70 | 109.93    | O67 | C16 | C17 | 113.78 | 111.22    |
| O67 | C16 | C34 | 110.82 | 110.21    | C18 | C17 | C16 | 122.95 | 122.16    |
| C37 | C17 | C16 | 123.69 | 123.00    | C37 | C17 | C18 | 112.15 | 112.45    |
| C17 | C18 | C4  | 108.96 | 112.35    | C19 | C18 | C4  | 109.95 | 111.89    |
| C19 | C18 | C17 | 100.75 | 100.77    | O68 | C18 | C4  | 113.11 | 110.78    |
| O68 | C18 | C17 | 108.30 | 109.89    | O68 | C18 | C19 | 114.91 | 110.80    |
| C20 | C19 | C18 | 123.49 | 122.64    | C38 | C19 | C18 | 108.70 | 109.64    |
| C38 | C19 | C20 | 123.56 | 122.64    | C19 | C20 | C6  | 122.82 | 122.63    |
| C21 | C20 | C6  | 109.38 | 109.70    | C21 | C20 | C19 | 122.72 | 122.65    |
| C22 | C21 | C20 | 100.18 | 100.68    | C40 | C21 | C20 | 109.82 | 111.94    |
| C40 | C21 | C22 | 109.03 | 112.32    | O69 | C21 | C20 | 117.16 | 111.31    |
| O69 | C21 | C22 | 112.93 | 110.48    | O69 | C21 | C40 | 107.44 | 109.85    |
| C21 | C22 | C7  | 112.40 | 112.42    | C23 | C22 | C7  | 123.92 | 122.94    |
| C23 | C22 | C21 | 122.70 | 122.32    | C24 | C23 | C22 | 110.10 | 112.00    |
| C42 | C23 | C22 | 108.63 | 112.18    | C42 | C23 | C24 | 100.18 | 100.71    |

|     |     |     |        |        |     |     |     |        |        |
|-----|-----|-----|--------|--------|-----|-----|-----|--------|--------|
| O70 | C23 | C22 | 108.92 | 110.64 | O70 | C23 | C24 | 116.12 | 110.91 |
| O70 | C23 | C42 | 112.47 | 110.04 | C25 | C24 | C23 | 123.00 | 122.74 |
| C44 | C24 | C23 | 109.09 | 109.59 | C44 | C24 | C25 | 123.38 | 122.79 |
| C24 | C25 | C8  | 123.00 | 122.54 | C26 | C25 | C8  | 109.11 | 109.77 |
| C26 | C25 | C24 | 123.25 | 122.46 | C25 | C26 | C10 | 100.19 | 100.46 |
| C27 | C26 | C10 | 108.63 | 112.42 | C27 | C26 | C25 | 109.81 | 112.12 |
| O71 | C26 | C10 | 112.21 | 109.91 | O71 | C26 | C25 | 111.54 | 110.47 |
| O71 | C26 | C27 | 113.63 | 111.02 | C28 | C27 | C26 | 122.60 | 121.97 |
| C45 | C27 | C26 | 123.93 | 123.17 | C45 | C27 | C28 | 112.57 | 112.55 |
| C29 | C28 | C27 | 108.96 | 112.35 | C47 | C28 | C27 | 100.19 | 100.76 |
| C47 | C28 | C29 | 109.67 | 111.89 | O72 | C28 | C27 | 112.39 | 109.72 |
| O72 | C28 | C29 | 108.74 | 110.54 | O72 | C28 | C47 | 116.50 | 111.24 |
| C28 | C29 | C11 | 122.89 | 122.35 | C30 | C29 | C11 | 112.34 | 112.30 |
| C30 | C29 | C28 | 123.70 | 123.04 | C29 | C30 | C13 | 112.74 | 112.80 |
| C31 | C30 | C13 | 122.25 | 121.95 | C31 | C30 | C29 | 124.27 | 123.20 |
| C32 | C31 | C30 | 109.06 | 112.28 | C48 | C31 | C30 | 109.82 | 111.89 |
| C48 | C31 | C32 | 100.16 | 100.70 | O73 | C31 | C30 | 107.45 | 109.87 |
| O73 | C31 | C32 | 112.90 | 110.50 | O73 | C31 | C48 | 117.17 | 111.33 |
| C33 | C32 | C31 | 122.71 | 122.33 | C50 | C32 | C31 | 112.43 | 112.41 |
| C50 | C32 | C33 | 123.88 | 122.94 | C32 | C33 | C14 | 108.60 | 112.21 |
| C34 | C33 | C14 | 100.25 | 100.75 | C34 | C33 | C32 | 110.08 | 112.03 |
| O74 | C33 | C14 | 112.48 | 110.02 | O74 | C33 | C32 | 108.96 | 110.61 |
| O74 | C33 | C34 | 116.06 | 110.88 | C33 | C34 | C16 | 108.99 | 109.59 |
| C35 | C34 | C16 | 123.49 | 122.82 | C35 | C34 | C33 | 123.10 | 122.73 |
| C36 | C35 | C34 | 123.16 | 122.48 | C51 | C35 | C34 | 122.89 | 122.50 |
| C51 | C35 | C36 | 109.15 | 109.78 | C37 | C36 | C35 | 109.82 | 112.10 |
| C53 | C36 | C35 | 100.14 | 100.43 | C53 | C36 | C37 | 108.63 | 112.38 |
| O75 | C36 | C35 | 111.61 | 110.50 | O75 | C36 | C37 | 113.58 | 111.05 |
| O75 | C36 | C53 | 112.22 | 109.94 | C36 | C37 | C17 | 123.98 | 123.17 |
| C38 | C37 | C17 | 112.54 | 112.56 | C38 | C37 | C36 | 122.58 | 121.96 |
| C37 | C38 | C19 | 100.22 | 100.74 | C39 | C38 | C19 | 109.64 | 111.93 |
| C39 | C38 | C37 | 108.92 | 112.40 | O76 | C38 | C19 | 116.54 | 111.22 |
| O76 | C38 | C37 | 112.40 | 109.70 | O76 | C38 | C39 | 108.74 | 110.51 |
| C40 | C39 | C38 | 123.77 | 123.03 | C54 | C39 | C38 | 122.90 | 122.34 |
| C54 | C39 | C40 | 112.29 | 112.27 | C39 | C40 | C21 | 124.23 | 123.19 |
| C41 | C40 | C21 | 122.28 | 121.94 | C41 | C40 | C39 | 112.76 | 112.79 |
| C42 | C41 | C40 | 108.55 | 112.50 | C55 | C41 | C40 | 100.10 | 100.65 |
| C55 | C41 | C42 | 109.74 | 111.90 | O77 | C41 | C40 | 112.32 | 109.93 |
| O77 | C41 | C42 | 113.44 | 110.83 | O77 | C41 | C55 | 111.86 | 110.63 |
| C41 | C42 | C23 | 122.79 | 122.15 | C43 | C42 | C23 | 112.20 | 112.49 |
| C43 | C42 | C41 | 124.21 | 123.13 | C44 | C43 | C42 | 112.68 | 112.54 |
| C60 | C43 | C42 | 123.65 | 123.26 | C60 | C43 | C44 | 122.81 | 122.05 |
| C43 | C44 | C24 | 100.04 | 100.62 | C45 | C44 | C24 | 109.82 | 112.04 |
| C45 | C44 | C43 | 108.76 | 112.38 | O78 | C44 | C24 | 110.86 | 110.21 |
| O78 | C44 | C43 | 112.70 | 109.92 | O78 | C44 | C45 | 113.79 | 111.22 |
| C44 | C45 | C27 | 123.69 | 122.97 | C46 | C45 | C27 | 112.12 | 112.46 |
| C46 | C45 | C44 | 122.99 | 122.18 | C47 | C46 | C45 | 100.75 | 100.75 |
| C59 | C46 | C45 | 108.96 | 112.38 | C59 | C46 | C47 | 109.98 | 111.93 |
| O79 | C46 | C45 | 108.32 | 109.87 | O79 | C46 | C47 | 114.86 | 110.77 |
| O79 | C46 | C59 | 113.12 | 110.75 | C46 | C47 | C28 | 108.73 | 109.64 |

|                      |     |     |        |        |      |     |     |        |        |
|----------------------|-----|-----|--------|--------|------|-----|-----|--------|--------|
| C48                  | C47 | C28 | 123.59 | 122.66 | C48  | C47 | C46 | 123.45 | 122.63 |
| C47                  | C48 | C31 | 122.71 | 122.66 | C49  | C48 | C31 | 109.37 | 109.69 |
| C49                  | C48 | C47 | 122.87 | 122.61 | C50  | C49 | C48 | 100.20 | 100.61 |
| C58                  | C49 | C48 | 110.00 | 112.02 | C58  | C49 | C50 | 108.95 | 112.34 |
| O80                  | C49 | C48 | 111.14 | 110.46 | O80  | C49 | C50 | 113.14 | 110.02 |
| O80                  | C49 | C58 | 112.71 | 110.97 | C49  | C50 | C32 | 112.59 | 112.69 |
| C51                  | C50 | C32 | 123.64 | 123.23 | C51  | C50 | C49 | 122.76 | 121.93 |
| C50                  | C51 | C35 | 110.29 | 112.03 | C52  | C51 | C35 | 100.14 | 100.53 |
| C52                  | C51 | C50 | 108.56 | 112.34 | O81  | C51 | C35 | 116.22 | 112.14 |
| O81                  | C51 | C50 | 108.33 | 110.21 | O81  | C51 | C52 | 112.94 | 109.26 |
| C53                  | C52 | C51 | 112.27 | 112.62 | C57  | C52 | C51 | 123.22 | 122.21 |
| C57                  | C52 | C53 | 123.62 | 123.17 | C52  | C53 | C36 | 112.62 | 112.71 |
| C54                  | C53 | C36 | 122.67 | 122.27 | C54  | C53 | C52 | 123.95 | 123.06 |
| C53                  | C54 | C39 | 108.68 | 112.03 | C55  | C54 | C39 | 100.34 | 100.91 |
| C55                  | C54 | C53 | 110.21 | 111.98 | O82  | C54 | C39 | 113.51 | 110.77 |
| O82                  | C54 | C53 | 107.32 | 109.77 | O82  | C54 | C55 | 116.53 | 111.14 |
| C54                  | C55 | C41 | 109.19 | 109.59 | C56  | C55 | C41 | 123.04 | 122.78 |
| C56                  | C55 | C54 | 122.71 | 122.54 | C57  | C56 | C55 | 123.19 | 122.49 |
| C60                  | C56 | C55 | 123.29 | 122.57 | C60  | C56 | C57 | 108.87 | 109.62 |
| C56                  | C57 | C52 | 110.21 | 111.99 | C58  | C57 | C52 | 108.67 | 112.00 |
| C58                  | C57 | C56 | 100.69 | 100.81 | O83  | C57 | C52 | 113.30 | 110.83 |
| O83                  | C57 | C56 | 115.07 | 110.70 | O83  | C57 | C58 | 107.95 | 110.12 |
| C57                  | C58 | C49 | 122.79 | 122.26 | C59  | C58 | C49 | 124.03 | 122.98 |
| C59                  | C58 | C57 | 112.23 | 112.43 | C58  | C59 | C46 | 123.44 | 123.23 |
| C60                  | C59 | C46 | 122.98 | 122.01 | C60  | C59 | C58 | 112.62 | 112.69 |
| C56                  | C60 | C43 | 109.82 | 111.93 | C59  | C60 | C43 | 108.63 | 112.43 |
| C59                  | C60 | C56 | 100.14 | 100.69 | O84  | C60 | C43 | 108.00 | 110.23 |
| O84                  | C60 | C56 | 116.73 | 112.12 | O84  | C60 | C59 | 113.15 | 109.11 |
| H85                  | O61 | C1  | 107.35 | 109.31 | H86  | O62 | C3  | 107.03 | 108.92 |
| H87                  | O63 | C6  | 106.90 | 109.05 | H88  | O64 | C8  | 106.82 | 108.68 |
| H89                  | O65 | C11 | 107.04 | 108.93 | H90  | O66 | C13 | 106.64 | 108.52 |
| H91                  | O67 | C16 | 107.03 | 109.14 | H92  | O68 | C18 | 107.24 | 109.27 |
| H93                  | O69 | C21 | 107.16 | 109.10 | H94  | O70 | C23 | 106.53 | 108.93 |
| H95                  | O71 | C26 | 106.64 | 108.60 | H96  | O72 | C28 | 106.58 | 108.97 |
| H97                  | O73 | C31 | 107.16 | 109.10 | H98  | O74 | C33 | 106.53 | 108.93 |
| H99                  | O75 | C36 | 106.63 | 108.60 | H100 | O76 | C38 | 106.59 | 108.98 |
| H10                  | O77 | C41 | 106.64 | 108.52 | H102 | O78 | C44 | 107.02 | 109.14 |
| H10                  | O79 | C46 | 107.20 | 109.28 | H104 | O80 | C49 | 106.92 | 109.05 |
| H10                  | O81 | C51 | 106.84 | 108.68 | H106 | O82 | C54 | 107.05 | 108.93 |
| H10                  | O83 | C57 | 107.33 | 109.31 | H108 | O84 | C60 | 107.03 | 108.92 |
| <b>RMSE = 2.13 °</b> |     |     |        |        |      |     |     |        |        |
